# Supplementary material
Source: Royal Society of Chemistry journal article supplement (doi:10.1039/d5tb02922h)

## A stimuli-responsive gradient-structured membrane for dual controlled release of bioactive agents: application to chronic wound dressings

D'orgevale Chobli, Katia Maria Perez Andeliz, Sébastien Massier, Louise Hespel, Stéphane Marais, Anthony C. Duncan

Univ Rouen Normandie, INSA Rouen Normandie, Polymers Biopolymers Surfaces (PBS)  
UMR 6270 CNRS, 76000 Rouen, France

Figure S1: Impact of the concentration of PVA in pure water (●) and in an aqueous solution of 4 % w/w PAA (◆)

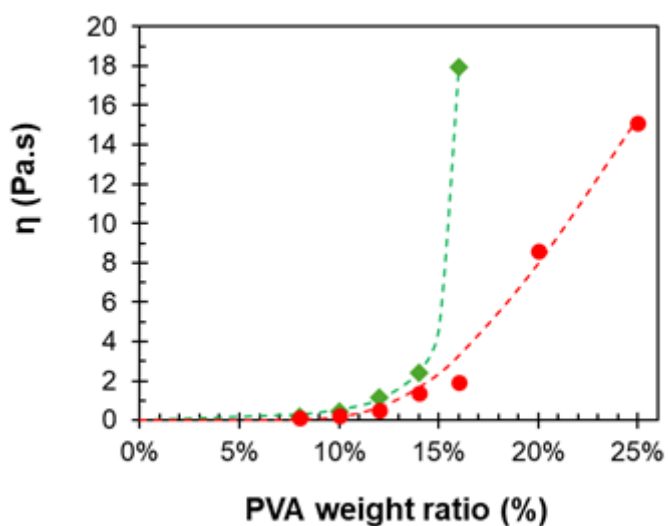

**Figure S2:** Microscopy pictures of PVA 14% and PVA14%-EtOH6%

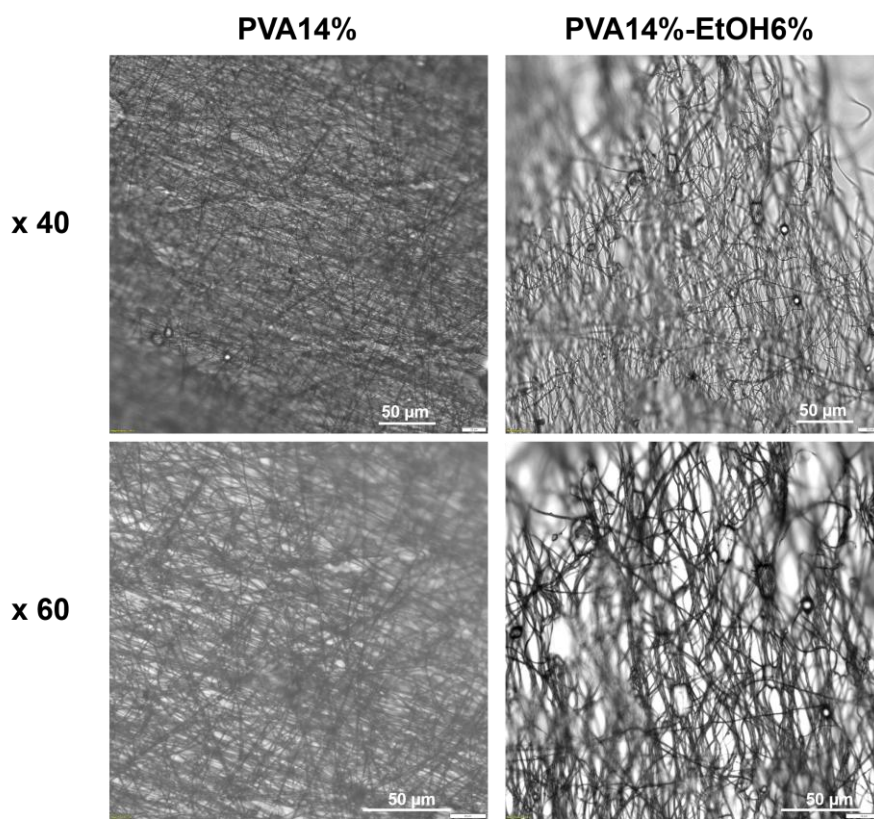

**Figure S3:** microscopy pictures of PVA8%-PAA4%, PVA8%-PAA4%-EtOH6% and PVA8%-PAA4%-EtOH6% after heat treatment

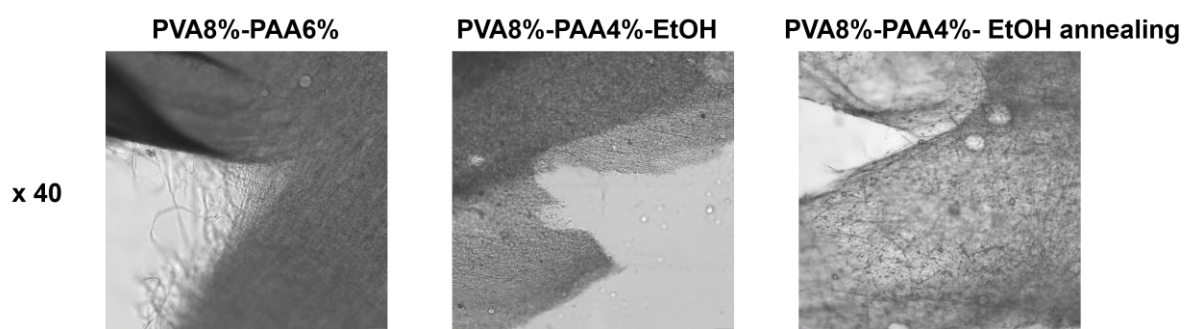

Figure S4: Pictures of PVA and heat treated PVA (PVAT) after immersion in water for 24 hours

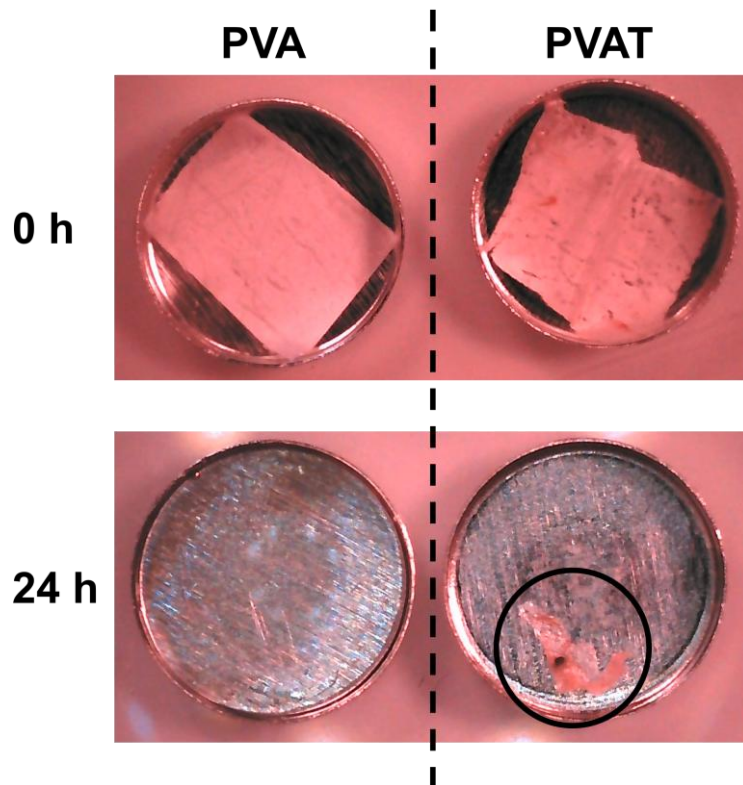

Figure S5: Water sorption measurements on PVAT and PVAT-PBA samples

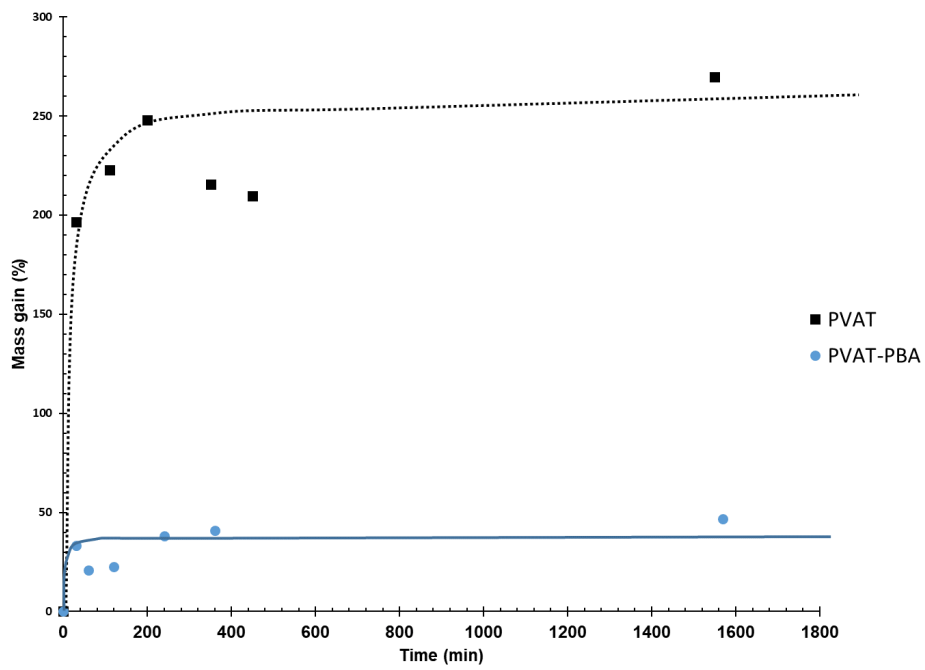

Figure S6: A) Thermal gravimetric analysis and B) DSC measurements of the different fibers

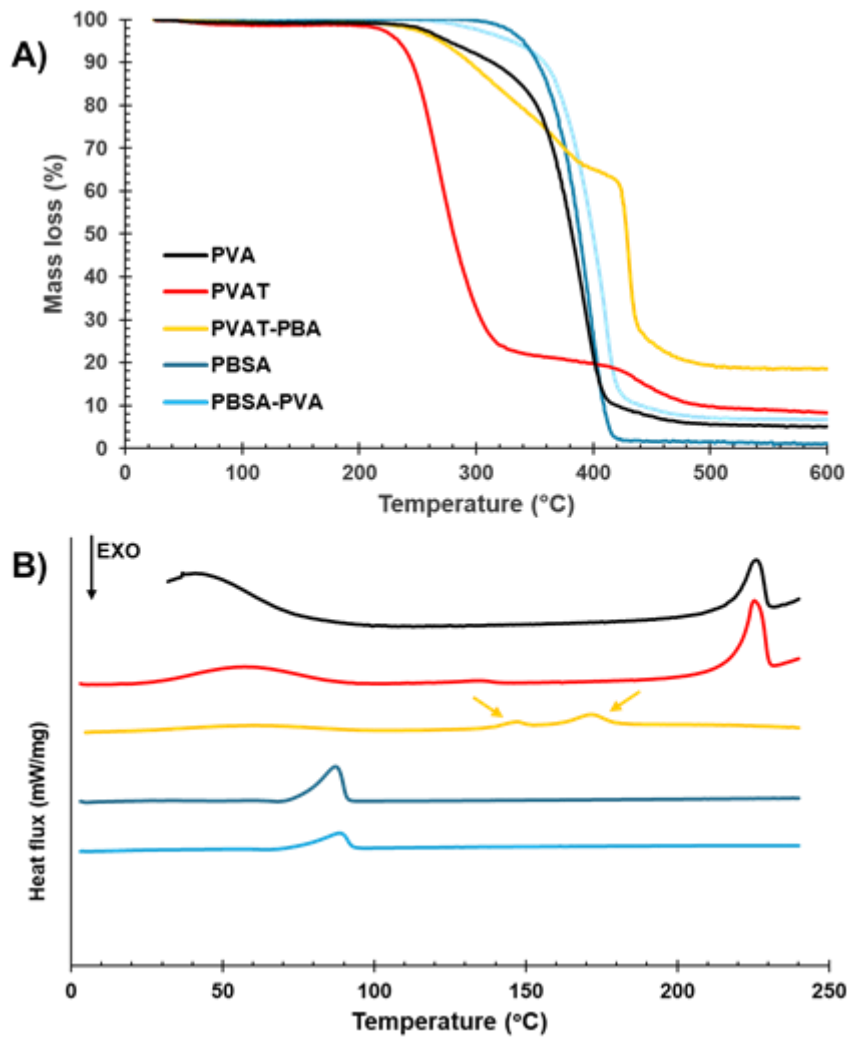

Figure S7: Degradation profile of PVA fibers expressed as the mass loss (%) versus time at 120 °C

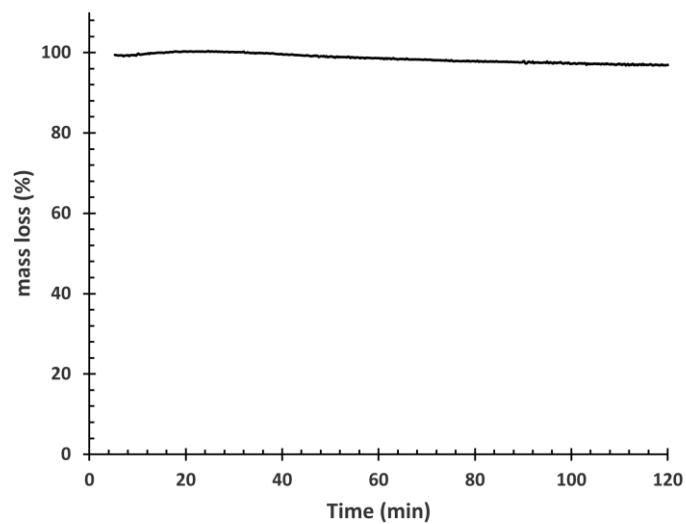

Figure S8: Degradation profile expressed as mass loss of PVA after curing 2 hours at 120 °C in the oven (plain line) and after curing 2 hours at 120 °C in the TGA (dash line)

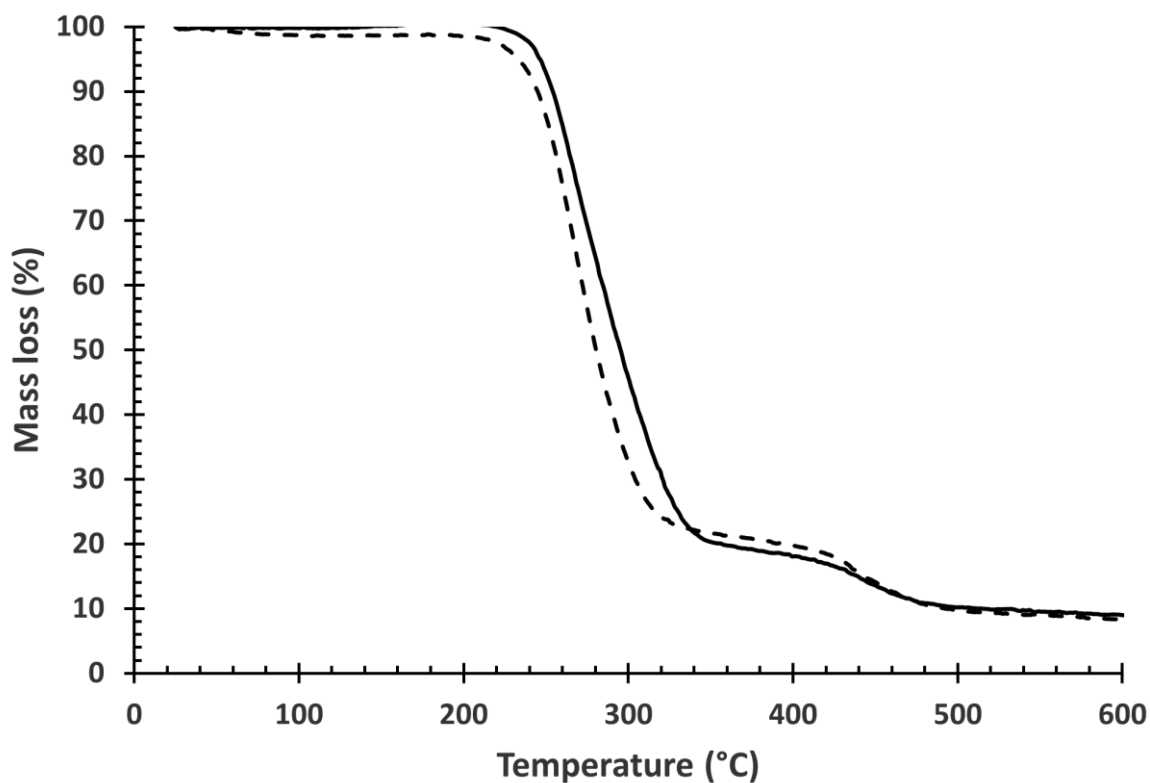

Figure S9: IR spectra of PBA, PVAT and PVAT-PBA

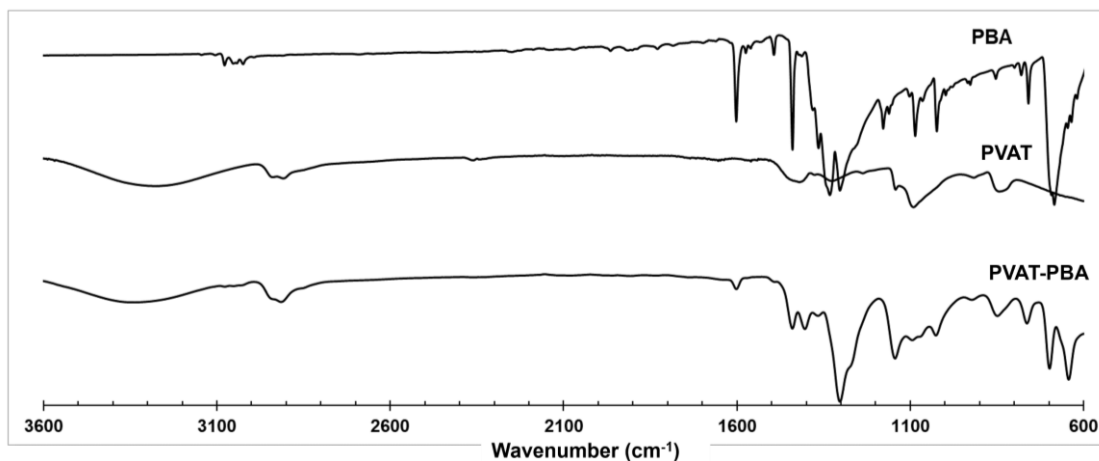

Figure S10: MEB pictures at 3000 magnifications of PVAT complexed with PBA shows area with A) high concentration of PBA and area with B) low concentration of PBA.

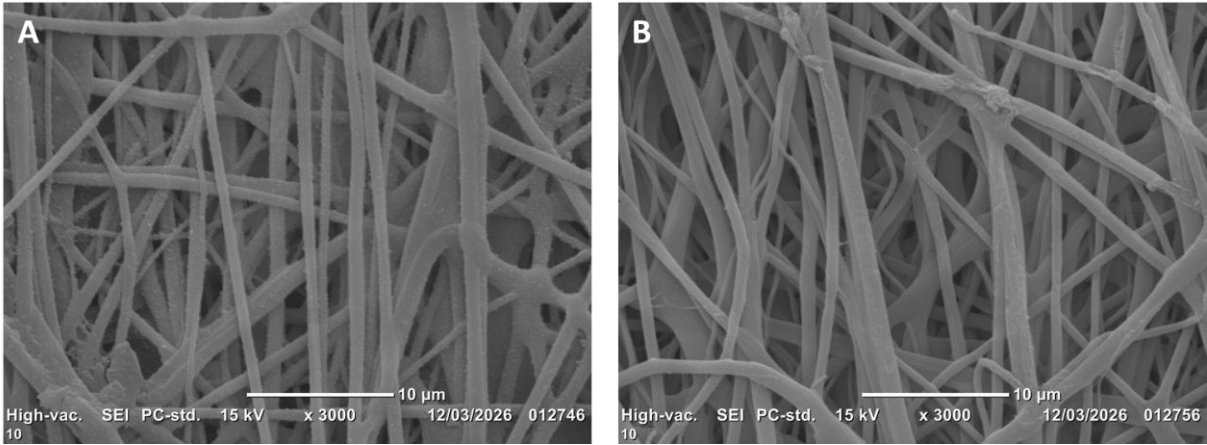

Figure S11: dynamic vapor measurements for PVAT, PVAT-PBA, PBSA and DCAM samples at 95 % humidity rate and at 25°C.

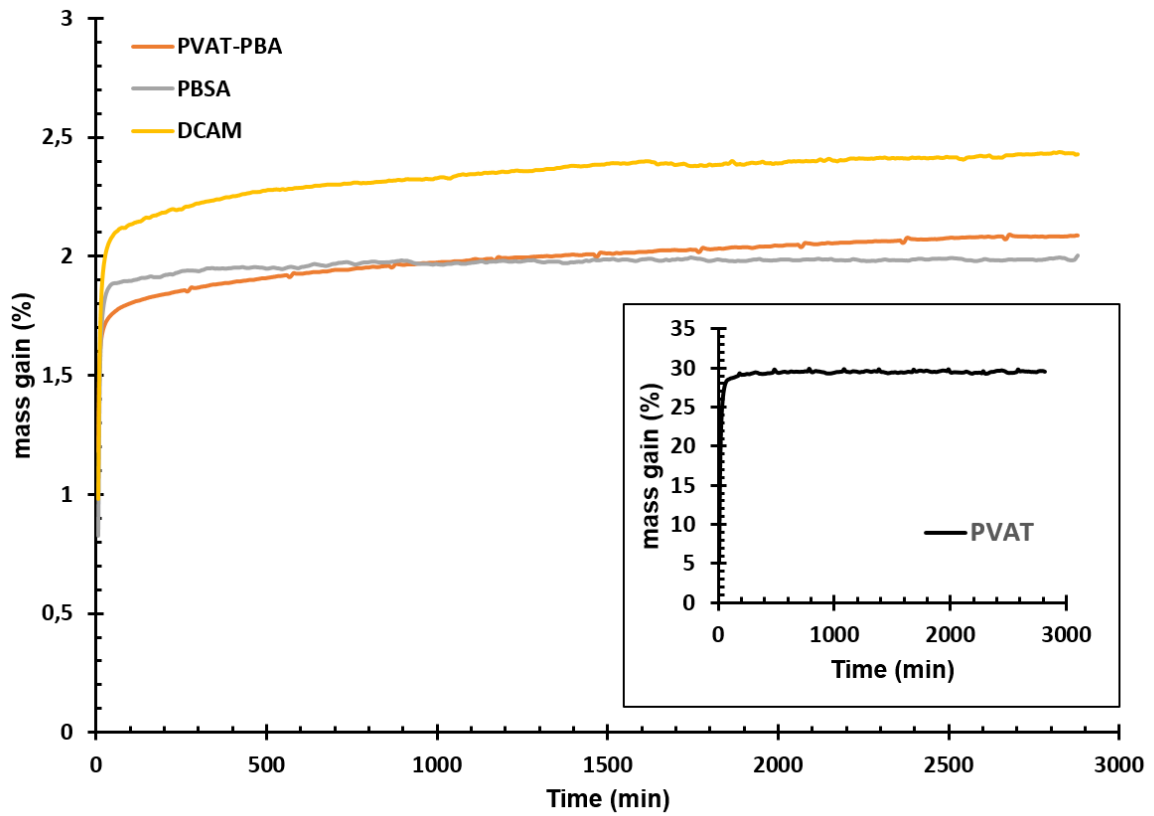

Supplement: d5tb02922h3.pdf [file d5tb02922h3.pdf]
